# Supplementary material for: Effects of dietary camelina, flaxseed, and canola oil supplementation on inflammatory and oxidative markers, transepidermal water loss, and coat quality in healthy adult dogs
Source: Frontiers journal article supplement (doi:10.3389/fvets.2023.1085890), 2023-03-09
Supplement: Data_Sheet_1.PDF [file Data_Sheet_1.PDF]

## Coat Quality Subjective Assessment

**Evaluator Name:**

**Dog Name:**

**Date:**

### Coat assessment

|                     | Score | 1                                 | 2                  | 3                   | 4                  | 5                 |
|---------------------|-------|-----------------------------------|--------------------|---------------------|--------------------|-------------------|
| Shedding - one pass |       | Severe loss                       | Excessive loss     | Moderate loss       | Minimal loss       | No hair loss      |
| Dander - back       |       | Severe                            | Excess             | Medium              | Slight             | None              |
| Shine               |       | Dull                              | Poorly reflective  | Slightly reflective | Somewhat shiny     | Glistens          |
| Spring              |       | Resistant                         | Slightly resistant | Bouncy              | Partial return     | Spontaneous       |
| Softness            |       | Extremely coarse                  | Moderately coarse  | Acceptable feel     | Moderately soft    | Extremely soft    |
| Softness uniformity |       | Extremely non-uniform in softness | Not very uniform   | Acceptably uniform  | Moderately uniform | Extremely uniform |
| Color               |       | Extremely dingy                   | Slightly dingy     | Typical             | Slightly intense   | Extremely intense |
| Color uniformity    |       | Extremely non-uniform in color    | Not very uniform   | Acceptably uniform  | Moderately uniform | Extremely uniform |
| Follicle density    |       | Extremely thin                    | Fairly thin        | Slightly dense      | Fairly dense       | Extremely dense   |

### Notes

**Supplementary material:** A 5-point Likert scale used to assess coat quality in 30 client-owned dogs enrolled in a research trial investigating the effects of three oil supplements (camelina, canola, flaxseed) on transepidermal water loss, inflammatory and oxidative markers, and coat quality over a 16-week period.
